# Supplementary material for: Cardiac and Skeletal Muscle Transcriptome Response to Heat Stress in Kenyan Chicken Ecotypes Adapted to Low and High Altitudes Reveal Differences in Thermal Tolerance and Stress Response
Source: Front Genet. 2019 Oct 11;10:993. doi: 10.3389/fgene.2019.00993 (PMC6798392; doi:10.3389/fgene.2019.00993)
Supplement: Supplementary file 3 [file Table_2.xlsx]

## Sheet: LL_node_table
																					TopologicalCoefficient	UpDown
	Result of Lowland network analysis with Network analyzer tool in cytoscape
	SUID	Gene_Name	Degree	Max_expression level	Max_Time	Max_Tissue	Up/Down	AverageShortestPathLength	BetweennessCentrality	ClosenessCentrality	ClusteringCoefficient	degree.layout	Eccentricity	IsSingleNode	NeighborhoodConnectivity	Radiality	selected	shared name	Stress	TopologicalCoefficient
	752	CCNB2	19	-2.92261	Chronic	Muscle	Up	0.196881	0.0781933	0.339286	0.146199	19	5	FALSE	5.36842	19	0.675439	FALSE	CCNB2	3252
	755	CRB2	19	2.2977	Chronic	Muscle	Up	0.227596	0.202393	0.41989	0.163743	19	4	FALSE	8.42105	19	0.769737	FALSE	CRB2	14260
	770	CHST9	18	-1.64599	Acute	Muscle	UP	0.227431	0.10453	0.376238	0.215686	18	5	FALSE	7.27778	18	0.723684	FALSE	CHST9	9442
	771	SESN1	18	3.27556	Acute	Muscle	Up	0.227431	0.10453	0.376238	0.215686	18	5	FALSE	7.27778	18	0.723684	FALSE	SESN1	9442
	753	NR4A3	17	-2.90497	Acute	Muscle	Up	0.238095	0.0355531	0.296875	0.147059	17	6	FALSE	5	17	0.605263	FALSE	NR4A3	2298
	759	FABP7	17	2.96564	Chronic	Muscle	Up	0.183601	0.266336	0.397906	0.176471	17	4	FALSE	6.05882	17	0.747807	FALSE	FABP7	14364
	766	HSP90AA1	15	1.40768	Acute	Muscle	Up	0.291954	0.0236299	0.348624	0.161905	15	5	FALSE	8.53333	15	0.688596	FALSE	HSP90AA1	3630
	767	HSPH1	14	2.25815	Acute	Muscle	Down	0.305419	0.0163875	0.345455	0.186813	14	5	FALSE	8.85714	14	0.684211	FALSE	HSPH1	2950
	750	CHAC1	13	-2.25362	Acute	Muscle	Down	0.215976	0.111631	0.336283	0.217949	13	5	FALSE	5.61538	13	0.671053	FALSE	CHAC1	4982
	756	CDKN1A	13	-6.14316	Chronic	Heart	Down	0.216783	0.116269	0.351852	0.230769	13	5	FALSE	4.76923	13	0.692982	FALSE	CDKN1A	6740
	757	lasp-2	13	-1.82448	Acute	Heart	Up	0.216783	0.116269	0.351852	0.230769	13	5	FALSE	4.76923	13	0.692982	FALSE	lasp-2	6740
	765	hsp70	13	1.4797	Chronic	Muscle	Down	0.312997	0.0106094	0.343891	0.192308	13	5	FALSE	9.07692	13	0.682018	FALSE	hsp70	2194
	764	SCD	12	-1.26686	Acute	Muscle	Up	0.365942	0.00665315	0.286792	0.19697	12	6	FALSE	8.41667	12	0.585526	FALSE	SCD	1562
	768	FABP1	12	1.48216	Acute	Muscle	Down	0.365942	0.00665315	0.286792	0.19697	12	6	FALSE	8.41667	12	0.585526	FALSE	FABP1	1562
	779	THBS1	12	-2.31176	Chronic	Heart	Down	0.337963	0.0382658	0.356808	0.242424	12	5	FALSE	12.25	12	0.699561	FALSE	THBS1	4772
	760	DBI	10	-4.27187	Acute	Heart	Down	0.313158	0.097254	0.417582	0.333333	10	4	FALSE	11.9	10	0.767544	FALSE	DBI	6106
	762	RXRG	10	-2.99413	Acute	Heart	Down	0.3275	0.0615171	0.422222	0.422222	10	4	FALSE	13.1	10	0.77193	FALSE	RXRG	4886
	772	ATRAID	10	-3.34233	Acute	Heart	Down	0.391667	0.0152615	0.351852	0.311111	10	5	FALSE	14.1	10	0.692982	FALSE	ATRAID	3492
	783	SCP2	10	-4.99972	Chronic	Heart	Down	0.255882	0.0606127	0.348624	0.288889	10	5	FALSE	8.7	10	0.688596	FALSE	SCP2	3202
	774	GADD45B	9	-1.23186	Chronic	Heart	Down	0.471111	0.0115432	0.31405	0.305556	9	5	FALSE	11.7778	9	0.635965	FALSE	GADD45B	2786
	780	SQLE	9	-4.03305	Acute	Heart	Down	0.415873	0.0135484	0.348624	0.277778	9	5	FALSE	14.5556	9	0.688596	FALSE	SQLE	3176
	754	ABRA	8	-2.05288	Acute	Heart	Up	0.235577	0.199754	0.449704	0.392857	8	4	FALSE	12.25	8	0.796053	FALSE	ABRA	11636
	758	IGF1	8	1.83523	Chronic	Heart	Down	0.285714	0.0499978	0.387755	0.357143	8	5	FALSE	10	8	0.736842	FALSE	IGF1	4090
	761	SOCS2	8	-1.57469	Chronic	Muscle	Down	0.221154	0.160102	0.449704	0.428571	8	4	FALSE	11.5	8	0.796053	FALSE	SOCS2	9614
	769	ApoD	8	-1.49938	Acute	Heart	Down	0.432143	0.0118083	0.347032	0.142857	8	5	FALSE	15.125	8	0.686404	FALSE	ApoD	2952
	777	NME4	8	-1.70758	Chronic	Heart	Down	0.495	0.00652914	0.312757	0.357143	8	5	FALSE	12.375	8	0.633772	FALSE	NME4	1972
	773	EMC4	7	-1.09135	Acute	Heart	Down	0.529762	0.00652914	0.311475	0.142857	7	5	FALSE	12.8571	7	0.631579	FALSE	EMC4	1972
	775	GPR39	7	-1.32686	Acute	Heart	Down	0.529762	0.00652914	0.311475	0.142857	7	5	FALSE	12.8571	7	0.631579	FALSE	GPR39	1972
	778	PITX2	7	-1.58297	Acute	Heart	Down	0.529762	0.00652914	0.311475	0.142857	7	5	FALSE	12.8571	7	0.631579	FALSE	PITX2	1972
	792	IFT43	7	-1.38749	Acute	Heart	Down	0.293436	0.0779205	0.376238	0.47619	7	5	FALSE	10.8571	7	0.723684	FALSE	IFT43	3896
	763	ACA64	6	-1.34054	Acute	Heart	Down	0.590278	0.00208754	0.308943	0.2	6	5	FALSE	14.1667	6	0.627193	FALSE	ACA64	456
	776	HINT2	6	-1.3884	Acute	Heart	Up	0.590278	0.00208754	0.308943	0.2	6	5	FALSE	14.1667	6	0.627193	FALSE	HINT2	456
	785	ZMYM3	6	2.52223	Acute	Muscle	Up	0.469136	0.00668562	0.320675	0.6	6	5	FALSE	12.6667	6	0.64693	FALSE	ZMYM3	818
	794	ACADL	6	1.35014	Acute	Muscle	Up	0.475309	0.00387096	0.320675	0.666667	6	5	FALSE	12.8333	6	0.64693	FALSE	ACADL	634
	803	CPXM1	6	1.23667	Acute	Muscle	Down	0.308642	0.0588672	0.315353	0.333333	6	5	FALSE	8.33333	6	0.638158	FALSE	CPXM1	2238
	822	ISG12(2)	6	-2.28331	Chronic	Muscle	Down	0.446667	0.00168077	0.304	0.733333	6	5	FALSE	11.1667	6	0.618421	FALSE	ISG12(2)	350
	751	DUSP8	5	-2.35203	Acute	Muscle	Up	0.475	0.000704	0.290076	0.7	5	6	FALSE	11.4	5	0.592105	FALSE	DUSP8	88
	781	DHCR7	5	1.31413	Chronic	Heart	Up	0.466667	0.000236	0.298039	0.8	5	6	FALSE	12.6	5	0.607456	FALSE	DHCR7	16
	782	CDK1	5	1.54201	Acute	Muscle	Down	0.433333	0.0022222	0.304	0.6	5	6	FALSE	13.2	5	0.618421	FALSE	CDK1	408
	789	DMTN	5	-1.87789	Acute	Muscle	Up	0.375	0.0608287	0.339286	0.5	5	5	FALSE	12	5	0.675439	FALSE	DMTN	4184
	791	DUSP5	5	1.7985	Acute	Muscle	Up	0.490909	0.000571	0.292308	0.8	5	6	FALSE	10.8	5	0.596491	FALSE	DUSP5	44
	795	OTUD1	5	-1.56803	Acute	Muscle	Down	0.533333	0.00380079	0.319328	0.6	5	5	FALSE	14.4	5	0.644737	FALSE	OTUD1	632
	804	SLC27A1	5	1.36576	Chronic	Heart	Up	0.41	0.0327945	0.300395	0.3	5	5	FALSE	8.2	5	0.611842	FALSE	SLC27A1	926
	806	SMC2	5	1.27742	Acute	Muscle	Up	0.377778	0.0072005	0.31405	0.7	5	5	FALSE	10.2	5	0.635965	FALSE	SMC2	456
	811	DNAJA4	5	1.17244	Acute	Muscle	Up	0.777778	0.000451	0.245161	0.1	5	6	FALSE	7.6	5	0.486842	FALSE	DNAJA4	18
	823	RRM2	5	1.73253	Chronic	Muscle	Up	0.512	0.00150533	0.302789	0.8	5	5	FALSE	12.8	5	0.616228	FALSE	RRM2	346
	824	GTSE1	5	1.81052	Chronic	Muscle	Down	0.512	0.00150533	0.302789	0.8	5	5	FALSE	12.8	5	0.616228	FALSE	GTSE1	346
	749	AANAT	4	-2.61045	Acute	Muscle	Down	0.5625	0.000616	0.288973	0.666667	4	6	FALSE	13.5	4	0.589912	FALSE	AANAT	86
	784	PLIN1	4	-2.24547	Acute	Muscle	Up	0.572917	0.000616	0.288973	0.666667	4	6	FALSE	13.75	4	0.589912	FALSE	PLIN1	86
	787	RACGAP1	4	1.7978	Acute	Muscle	Up	0.597222	0.000117	0.277372	0.833333	4	6	FALSE	10.75	4	0.565789	FALSE	RACGAP1	2
	788	CCL19	4	2.6827	Acute	Muscle	Up	0.53	0.0200673	0.311475	0.333333	4	6	FALSE	13.5	4	0.631579	FALSE	CCL19	960
	790	CCNB3	4	1.52237	Acute	Muscle	Down	0.579545	0	0.291188	1	4	6	FALSE	12.75	4	0.594298	FALSE	CCNB3	0
	796	PDK4	4	-4.1009	Acute	Muscle	Up	0.5625	0.000616	0.288973	0.666667	4	6	FALSE	13.5	4	0.589912	FALSE	PDK4	86
	797	PFKFB3	4	1.75578	Chronic	Muscle	Down	0.611111	0.00380079	0.317992	0.333333	4	5	FALSE	16.5	4	0.642544	FALSE	PFKFB3	632
	799	RFESD	4	-2.25496	Acute	Muscle	Up	0.625	0.000117	0.277372	0.833333	4	6	FALSE	11.25	4	0.565789	FALSE	RFESD	2
	808	LSS	4	5.53514	Chronic	Muscle	Up	0.361111	0.042282	0.391753	0.666667	4	4	FALSE	13	4	0.741228	FALSE	LSS	2794
	810	GPR182	4	3.0056	Acute	Heart	Up	0.634615	0.000117	0.263889	0.833333	4	6	FALSE	8.25	4	0.535088	FALSE	GPR182	2
	816	NSDHL	4	2.09024	Acute	Heart	Down	0.634615	0.000117	0.263889	0.833333	4	6	FALSE	8.25	4	0.535088	FALSE	NSDHL	2
	818	HBAD	4	-1.60936	Acute	Muscle	Down	0.46	0.00693734	0.310204	0.666667	4	5	FALSE	11.5	4	0.629386	FALSE	HBAD	450
	819	HSPB7	4	-1.4022	Acute	Muscle	Up	0.57	0.00150533	0.301587	0.666667	4	5	FALSE	14.25	4	0.614035	FALSE	HSPB7	346
	820	RRAD	4	4.08858	Chronic	Muscle	Up	0.57	0.00150533	0.301587	0.666667	4	5	FALSE	14.25	4	0.614035	FALSE	RRAD	346
	825	SCG2	4	1.82329	Chronic	Muscle	Up	0.59	0.00150533	0.301587	0.666667	4	5	FALSE	14.75	4	0.614035	FALSE	SCG2	346
	786	CCL1	3	1.87597	Acute	Muscle	Down	0.740741	0	0.276364	1	3	6	FALSE	13.3333	3	0.563596	FALSE	CCL1	0
	800	CIDEA	3	-1.48542	Chronic	Heart	Up	0.74359	0	0.262976	1	3	6	FALSE	9.66667	3	0.532895	FALSE	CIDEA	0
	801	MT4	3	-3.1675	Acute	Heart	Down	0.74359	0	0.262976	1	3	6	FALSE	9.66667	3	0.532895	FALSE	MT4	0
	809	DGAT2	3	2.50859	Acute	Heart	Down	0.769231	0	0.262976	1	3	6	FALSE	10	3	0.532895	FALSE	DGAT2	0
	812	FABP4	3	-1.97839	Chronic	Heart	Down	0.479167	0.0019236	0.270463	0.333333	3	6	FALSE	8	3	0.550439	FALSE	FABP4	22
	814	FGF12	3	-1.71781	Acute	Heart	Down	0.74359	0	0.262976	1	3	6	FALSE	9.66667	3	0.532895	FALSE	FGF12	0
	815	IGSF5	3	-1.68249	Acute	Heart	Down	0.74359	0	0.262976	1	3	6	FALSE	9.66667	3	0.532895	FALSE	IGSF5	0
	817	SRGN	3	3.82037	Acute	Heart	Up	0.769231	0	0.262976	1	3	6	FALSE	10	3	0.532895	FALSE	SRGN	0
	793	TP53I3	2	-2.34976	Chronic	Muscle	Up	0.789474	0	0.258503	1	2	6	FALSE	15	2	0.52193	FALSE	TP53I3	0
	798	NELL2	2	2.91167	Acute	Muscle	Up	1	0	0.275362	1	2	6	FALSE	18	2	0.561404	FALSE	NELL2	0
	802	COMMD4	2	1.34961	Chronic	Heart	Up	1	0	0.262069	1	2	6	FALSE	13	2	0.530702	FALSE	COMMD4	0
	805	FAXDC2	2	1.05909	Chronic	Heart	Up	0.666667	0	0.24127	1	2	6	FALSE	4	2	0.475877	FALSE	FAXDC2	0
	807	TTC28	2	1.26613	Chronic	Heart	Up	0.666667	0	0.24127	1	2	6	FALSE	4	2	0.475877	FALSE	TTC28	0
	813	HSPA8	2	1.32098	Chronic	Muscle	Down	0.590909	0	0.263889	1	2	6	FALSE	6.5	2	0.535088	FALSE	HSPA8	0
	821	EMC4	2	-5.31275	Acute	Heart	0	0.708333	0.312757	1	2	5	FALSE	8.5	2	0	FALSE	0	EMC4	0

## Sheet: HL_node_table
	Result of Highland network analysis with Network analyzer tool in cytoscape
	SUID	Gene_Name	Degree	Max_expression level	Max_Time	Max_Tissue	Up/Down	AverageShortestPathLength	BetweennessCentrality	ClosenessCentrality	ClusteringCoefficient	degree.layout	Eccentricity	IsSingleNode	NeighborhoodConnectivity	Radiality	selected	shared name	Stress	TopologicalCoefficient
	127	COMMD4	20	1.84411	Chronic	Heart	Down	2.54054	0.153681	0.393617	0.184211	20	5	FALSE	6.95	0.807432	FALSE	COMMD4	10322	0.198571
	112	TTC32	19	1.66966	Chronic	Heart	Up	2.2973	0.21338	0.435294	0.210526	19	4	FALSE	7.89474	0.837838	FALSE	TTC32	19330	0.18797
	122	H1F0	18	1.39519	Acute	Muscle	Up	2.54054	0.119538	0.393617	0.215686	18	5	FALSE	8.72222	0.807432	FALSE	H1F0	10572	0.212737
	130	ACYP1	18	1.60023	Chronic	Heart	Up	2.31081	0.179158	0.432749	0.24183	18	4	FALSE	8.55556	0.836149	FALSE	ACYP1	18368	0.203704
	117	RPS28	17	1.78878	Acute	Muscle	Up	2.47297	0.10579	0.404372	0.264706	17	5	FALSE	9.58824	0.815878	FALSE	RPS28	10516	0.204005
	96	PDK4	15	-4.63904	Acute	Muscle	Down	2.90541	0.078425	0.344186	0.219048	15	6	FALSE	7.86667	0.761824	FALSE	PDK4	5182	0.238384
	95	FABP1	14	5.15697	Acute	Muscle	Up	3.17568	0.0430625	0.314894	0.197802	14	6	FALSE	6.5	0.728041	FALSE	FABP1	1294	0.209677
	88	ATRAID	13	1.68693	Acute	Heart	Up	2.87838	0.0682462	0.347418	0.333333	13	6	FALSE	7.53846	0.765203	FALSE	ATRAID	3902	0.251282
	115	SRGN	13	2.02632	Chronic	Heart	Up	2.74324	0.0629621	0.364532	0.294872	13	5	FALSE	9.46154	0.782095	FALSE	SRGN	6706	0.278281
	98	FABP4	12	-2.30848	Chronic	Heart	Down	3.27027	0.138209	0.305785	0.136364	12	6	FALSE	4.66667	0.716216	FALSE	FABP4	16016	0.24537
	126	DACT2	10	-1.20745	Chronic	Muscle	Down	2.59459	0.0195808	0.385417	0.6	10	5	FALSE	13.2	0.800676	FALSE	DACT2	2406	0.286957
	91	FOS	9	1.65343	Acute	Muscle	Up	3.28378	0.0740685	0.304527	0.0555556	9	7	FALSE	5.33333	0.714527	FALSE	FOS	3424	0.281046
	101	MT4	9	2.03524	Acute	Muscle	Up	3.22973	0.00966586	0.309623	0.361111	9	6	FALSE	8.22222	0.721284	FALSE	MT4	1290	0.357488
	93	HINTW	8	1.5004	Chronic	Heart	Up	3.36486	0.0517376	0.297189	0.357143	8	6	FALSE	5.5	0.704392	FALSE	HINTW	2876	0.275
	99	FGF10	8	2.41214	Acute	Muscle	Up	2.82432	0.0205678	0.354067	0.357143	8	6	FALSE	13.75	0.771959	FALSE	FGF10	3316	0.3125
	100	DBI	8	5.64419	Acute	Muscle	Up	2.94595	0.0529289	0.33945	0.357143	8	6	FALSE	10.5	0.756757	FALSE	DBI	4452	0.3
	102	SEC61G	8	1.66905	Acute	Muscle	Up	2.82432	0.0205678	0.354067	0.357143	8	6	FALSE	13.75	0.771959	FALSE	SEC61G	3316	0.3125
	105	C12ORF57	8	1.63656	Acute	Muscle	Up	2.82432	0.0205678	0.354067	0.357143	8	6	FALSE	13.75	0.771959	FALSE	C12ORF57	3316	0.3125
	107	AGO2	8	-5.97007	Acute	Muscle	Down	3.54054	0.0249611	0.282443	0.321429	8	7	FALSE	7	0.682432	FALSE	AGO2	5878	0.411765
	79	COL12A1	7	1.70728	Acute	Muscle	Up	2.86486	0.00902319	0.349057	0.428571	7	6	FALSE	14.5714	0.766892	FALSE	COL12A1	872	0.346939
	97	DUSP8	7	-5.41511	Acute	Muscle	Down	3.37838	0.0231457	0.296	0.428571	7	7	FALSE	8.71429	0.702703	FALSE	DUSP8	2340	0.311224
	103	FGF1	7	-3.22169	Acute	Muscle	Down	3.51351	0.009195	0.284615	0.571429	7	7	FALSE	7.85714	0.685811	FALSE	FGF1	1718	0.37415
	109	JUN	7	1.96562	Chronic	Muscle	Up	3.63514	0.220597	0.275093	0.285714	7	6	FALSE	4.42857	0.670608	FALSE	JUN	24634	0.316327
	123	APOA1	7	-4.81277	Chronic	Muscle	Down	2.64865	0.0580161	0.377551	0.619048	7	5	FALSE	13.5714	0.793919	FALSE	APOA1	5352	0.357143
	81	FGF16	6	1.77388	Chronic	Muscle	Up	3.01351	0.0093679	0.331839	0.533333	6	6	FALSE	12.6667	0.748311	FALSE	FGF16	1104	0.446429
	89	SNCG1	6	2.26704	Acute	Muscle	Up	3.01351	0.00708417	0.331839	0.466667	6	6	FALSE	12.8333	0.748311	FALSE	SNCG1	1080	0.442529
	92	ARID5A	6	-1.27522	Acute	Muscle	Down	3.01351	0.0138083	0.331839	0.4	6	6	FALSE	11	0.748311	FALSE	ARID5A	1088	0.37931
	120	NR4A3	6	-2.40619	Chronic	Heart	Down	2.89189	0.0447994	0.345794	0.533333	6	5	FALSE	11	0.763514	FALSE	NR4A3	4398	0.37931
	132	MUC13	6	-1.64311	Chronic	Heart	Down	4.5	0.0765149	0.222222	0.466667	6	7	FALSE	4.33333	0.5625	FALSE	MUC13	8984	0.393939
	64	REXO1	5	3.20713	Acute	Muscle	Up	3.40541	0.00737116	0.293651	0.6	5	7	FALSE	9.4	0.699324	FALSE	REXO1	370	0.391667
	65	FBXO32	5	-2.68972	Acute	Muscle	Down	3.2027	0.013789	0.312236	0.5	5	7	FALSE	10.2	0.724662	FALSE	FBXO32	702	0.364286
	69	FKBP51	5	-2.33353	Acute	Heart	Down	4.13514	0.0344054	0.24183	0.5	5	7	FALSE	5.8	0.608108	FALSE	FKBP51	4312	0.341176
	70	SOCS6	5	-2.39991	Chronic	Heart	Down	4.60811	0.00530999	0.217009	0.3	5	8	FALSE	4.4	0.548986	FALSE	SOCS6	334	0.488889
	71	SCD	5	2.52124	Acute	Heart	Up	4.60811	0.00530999	0.217009	0.3	5	8	FALSE	4.4	0.548986	FALSE	SCD	334	0.488889
	72	RAD23	5	-1.71857	Acute	Muscle	Down	3.90541	0.0147231	0.256055	0.5	5	7	FALSE	5.6	0.636824	FALSE	RAD23	1246	0.4
	73	HSPB1	5	-4.90665	Chronic	Heart	Down	3.54054	0.0637334	0.282443	0.4	5	7	FALSE	6.2	0.682432	FALSE	HSPB1	3020	0.333333
	74	F13A1	5	-1.30195	Acute	Muscle	Down	3.90541	0.0147231	0.256055	0.5	5	7	FALSE	5.6	0.636824	FALSE	F13A1	1246	0.4
	80	TTLL9	5	-1.08975	Chronic	Muscle	Down	3.02703	0.00665223	0.330357	0.4	5	6	FALSE	14.2	0.746622	FALSE	TTLL9	1072	0.5
	83	RFESD	5	-1.50371	Chronic	Muscle	Down	3.14865	0.000752	0.317597	0.8	5	6	FALSE	13.6	0.731419	FALSE	RFESD	256	0.485714
	84	FGF12	5	-1.16108	Chronic	Muscle	Down	3.02703	0.00665223	0.330357	0.4	5	6	FALSE	14.2	0.746622	FALSE	FGF12	1072	0.5
	87	DUSP5	5	1.41246	Chronic	Muscle	Up	3.02703	0.00665223	0.330357	0.4	5	6	FALSE	14.2	0.746622	FALSE	DUSP5	1072	0.5
	121	LPAR1	5	1.26501	Chronic	Heart	Up	2.90541	0.116623	0.344186	0.7	5	5	FALSE	11.2	0.761824	FALSE	LPAR1	13392	0.414815
	125	EMC4	5	1.88869	Chronic	Heart	Up	2.95946	0.0116612	0.3379	0.7	5	5	FALSE	12	0.755068	FALSE	EMC4	2162	0.461538
	128	AKR1D1	5	2.03935	Chronic	Heart	Up	2.77027	0.0253797	0.360976	0.6	5	5	FALSE	14.8	0.778716	FALSE	AKR1D1	3284	0.435294
	129	ADD2	5	1.10986	Chronic	Heart	Up	2.90541	0.116623	0.344186	0.7	5	5	FALSE	11.2	0.761824	FALSE	ADD2	13392	0.414815
	133	HSPH1	5	1.76948	Acute	Muscle	Up	4.51351	0.0268419	0.221557	0.5	5	7	FALSE	5	0.560811	FALSE	HSPH1	4506	0.454545
	136	ACTA1	5	-1.18763	Chronic	Heart	Down	5.41892	0.000987	0.184539	0.6	5	8	FALSE	4	0.447635	FALSE	ACTA1	12	0.571429
	62	IFI27L2	4	2.09088	Acute	Muscle	Up	3.58108	0.000123	0.279245	0.833333	4	7	FALSE	9.5	0.677365	FALSE	IFI27L2	2	0.413043
	67	HMGA1	4	-7.44066	Chronic	Heart	Down	3.78378	0.00523785	0.264286	0.666667	4	7	FALSE	7	0.652027	FALSE	HMGA1	250	0.4375
	68	GTSE1	4	1.19916	Acute	Heart	Up	4.14865	0.0146767	0.241042	0.5	4	7	FALSE	6.75	0.606419	FALSE	GTSE1	2590	0.397059
	85	HSPB7	4	1.24604	Acute	Muscle	Up	3.39189	0.00677725	0.294821	0.666667	4	6	FALSE	9.25	0.701014	FALSE	HSPB7	652	0.440476
	90	KLHL38	4	-1.45395	Acute	Muscle	Down	3.56757	0.000147	0.280303	0.833333	4	7	FALSE	9.75	0.679054	FALSE	KLHL38	4	0.40625
	94	ALDH1A1	4	-2.49196	Chronic	Heart	Down	2.93243	0.0210044	0.341014	0.666667	4	5	FALSE	11.25	0.758446	FALSE	ALDH1A1	2148	0.401786
	104	CDK1	4	2.69843	Acute	Muscle	Up	4.25676	0.000108	0.234921	0.833333	4	8	FALSE	6.5	0.592905	FALSE	CDK1	4	0.590909
	106	AMER3	4	-2.0903	Acute	Muscle	Down	4.25676	0.000108	0.234921	0.833333	4	8	FALSE	6.5	0.592905	FALSE	AMER3	4	0.590909
	110	CHAC1	4	-3.89573	Chronic	Muscle	Down	4.55405	0.000864	0.219585	0.666667	4	7	FALSE	4.5	0.555743	FALSE	CHAC1	12	0.5
	113	TP53I3	4	1.88879	Acute	Heart	Up	3.04054	0.000123	0.328889	0.833333	4	5	FALSE	15	0.744932	FALSE	TP53I3	2	0.535714
	114	SESN1	4	-1.5478	Chronic	Heart	Down	2.78378	0.0245737	0.359223	0.5	4	5	FALSE	17.25	0.777027	FALSE	SESN1	3228	0.515152
	116	SMOC2	4	1.08237	Acute	Heart	Up	3.04054	0	0.328889	1	4	5	FALSE	15.25	0.744932	FALSE	SMOC2	0	0.544643
	118	RBP7	4	-2.49326	Chronic	Heart	Down	2.78378	0.0245737	0.359223	0.5	4	5	FALSE	17.25	0.777027	FALSE	RBP7	3228	0.515152
	119	PPP1R1B	4	1.49567	Chronic	Heart	Up	2.78378	0.0245737	0.359223	0.5	4	5	FALSE	17.25	0.777027	FALSE	PPP1R1B	3228	0.515152
	124	GADD45B	4	-1.0769	Acute	Heart	Down	3.04054	0	0.328889	1	4	5	FALSE	15.25	0.744932	FALSE	GADD45B	0	0.544643
	63	LRRC4	3	1.05418	Acute	Muscle	Up	4.89189	7.41e-05	0.20442	0.666667	3	8	FALSE	5	0.513514	FALSE	LRRC4	2	0.714286
	66	HSPA8	3	1.4462	Acute	Muscle	Up	4.02703	0	0.248322	1	3	7	FALSE	8	0.621622	FALSE	HSPA8	0	0.533333
	75	PLIN1	3	1.90105	Acute	Heart	Up	3.05405	0	0.327434	1	3	5	FALSE	14.3333	0.743243	FALSE	PLIN1	0	0.511905
	76	IGJ	3	3.41871	Acute	Heart	Up	3.48649	0	0.286822	1	3	6	FALSE	12	0.689189	FALSE	IGJ	0	0.571429
	77	FCGBP	3	3.82383	Acute	Heart	Up	3.48649	0	0.286822	1	3	6	FALSE	12	0.689189	FALSE	FCGBP	0	0.571429
	82	RRAD	3	2.94517	Chronic	Muscle	Up	3.83784	0	0.260563	1	3	7	FALSE	6.66667	0.64527	FALSE	RRAD	0	0.512821
	86	HINT2	3	1.86163	Acute	Muscle	Up	3.83784	0	0.260563	1	3	7	FALSE	6.66667	0.64527	FALSE	HINT2	0	0.512821
	108	SMC2	3	-1.32163	Chronic	Muscle	Down	4.59459	0	0.217647	1	3	7	FALSE	4.66667	0.550676	FALSE	SMC2	0	0.666667
	111	ACYP2	3	-1.63132	Chronic	Muscle	Down	4.59459	0	0.217647	1	3	7	FALSE	4.66667	0.550676	FALSE	ACYP2	0	0.666667
	131	OTUD1	3	-2.07061	Acute	Muscle	Down	5.45946	0	0.183168	1	3	8	FALSE	4.66667	0.442568	FALSE	OTUD1	0	0.777778
	134	GSTZ1	3	-2.01165	Chronic	Muscle	Down	5.44595	0	0.183623	1	3	8	FALSE	5.33333	0.444257	FALSE	GSTZ1	0	0.761905
	135	ARRDC2	3	-2.19061	Acute	Muscle	Down	5.45946	0	0.183168	1	3	8	FALSE	4.66667	0.442568	FALSE	ARRDC2	0	0.777778
	78	DGAT2	2	2.52472	Acute	Heart	Up	3.5	0	0.285714	1	2	6	FALSE	16.5	0.6875	FALSE	DGAT2	0	0.785714

## Sheet: Genes_Common_Between_Networks
	List of Genes found to be common between the Lowland and Highland networks
	COMMD4
	PDK4
	FABP1
	ATRAID
	SRGN
	FABP4
	MT4
	DBI
	DUSP8
	NR4A3
	SCD
	RFESD
	FGF12
	DUSP5
	EMC4
	HSPH1
	GTSE1
	HSPB7
	CDK1
	CHAC1
	TP53I3
	SESN1
	GADD45B
	HSPA8
	PLIN1
	RRAD
	HINT2
	SMC2
	OTUD1
	DGAT2
